# Supplementary material for: Facile preparation of flexible porous carbon fibers as self-supporting sulfur cathode hosts for high-performance Li–S batteries
Source: Royal Society of Chemistry journal article supplement (doi:10.1039/d2dt02625b), 2022-01-01
Supplement: d2dt02625b1.pdf [file d2dt02625b1.pdf]

## Supplemental information

### **Facile preparation of flexible porous carbon fibers as self-supporting sulfur cathode host for high performance Li-S batteries**

Yuyun Li<sup>a,b</sup>, Dongyuan Lei<sup>a,b</sup>, Shixun Yang<sup>a,b</sup>, Jiqun Chen<sup>c</sup>, Zirui Zhao<sup>a,b</sup>, Junming Guo<sup>a,b</sup>,  
Mingwu Xiang<sup>a,b,\*</sup>, Xiaofang Liu<sup>a,b</sup>, Wei Bai<sup>a,b</sup>

<sup>a</sup> National and Local Joint Engineering Research Center for Green Preparation Technology of Biobased Materials, Yunnan Minzu University, Kunming, 650500, China;

<sup>b</sup> Key Laboratory of Green-chemistry Materials in University of Yunnan Province, Yunnan Minzu University, Kunming, 650500, China;

<sup>c</sup> Yunnan Tianhong Chemical Engineering Co., Ltd., Kunming, 650106, China.

*corresponding author E-mail:* xmwbbboy@163.com (M. W. Xiang)

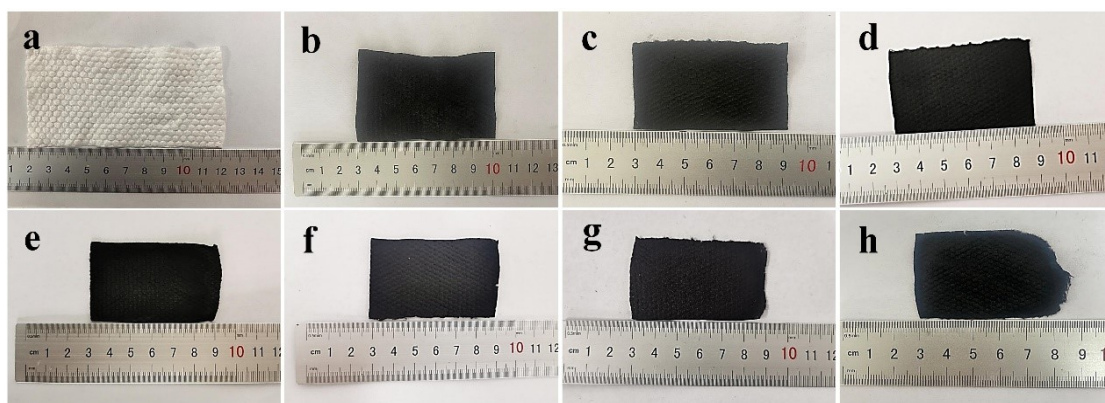

**Fig.S1** Digital photographs of (a) MC, (b) PCF, (c) CF, (d) SPCF1, (e) SPCF2, (f) SPCF3, (g) SPCF4 and (h) SPCF5 samples.

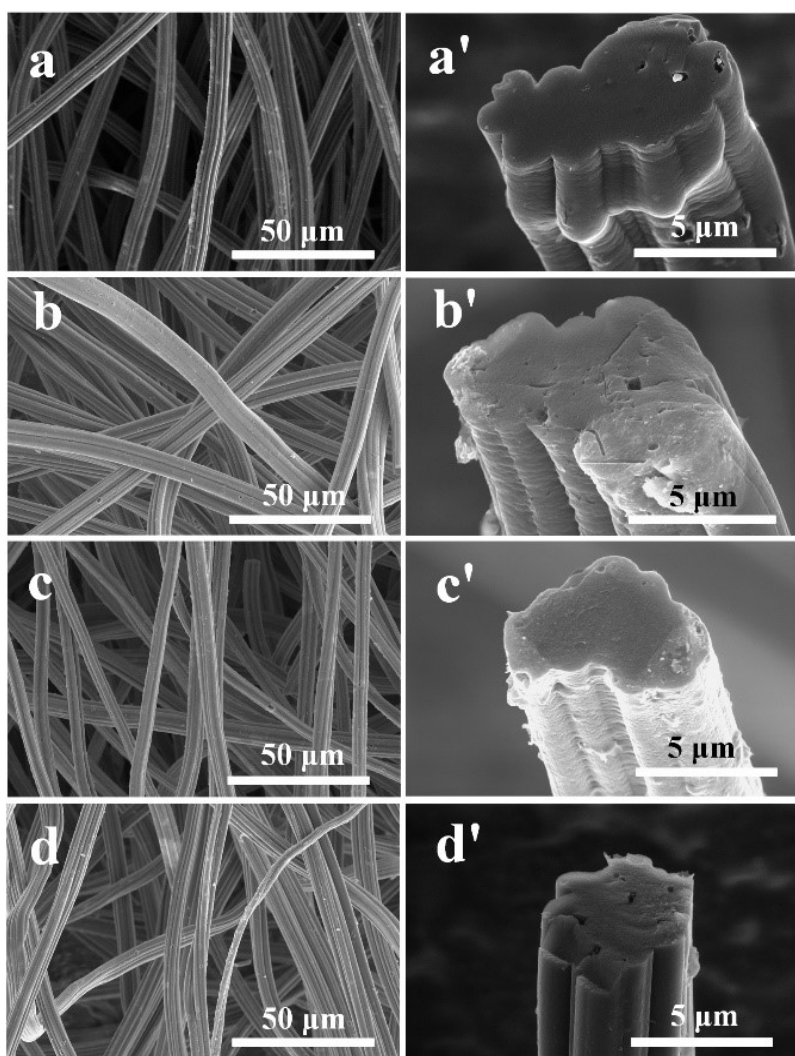

**Fig.S2** SEM images of (a, a') SPCF1, (b, b') SPCF2, (c, c') SPCF3, (d, d') SPCF5 samples.

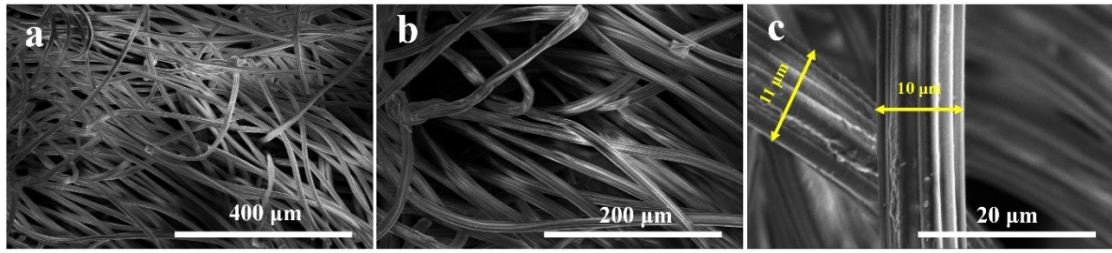

**Fig.S3** SEM images of pristine MC sample with various magnifications.

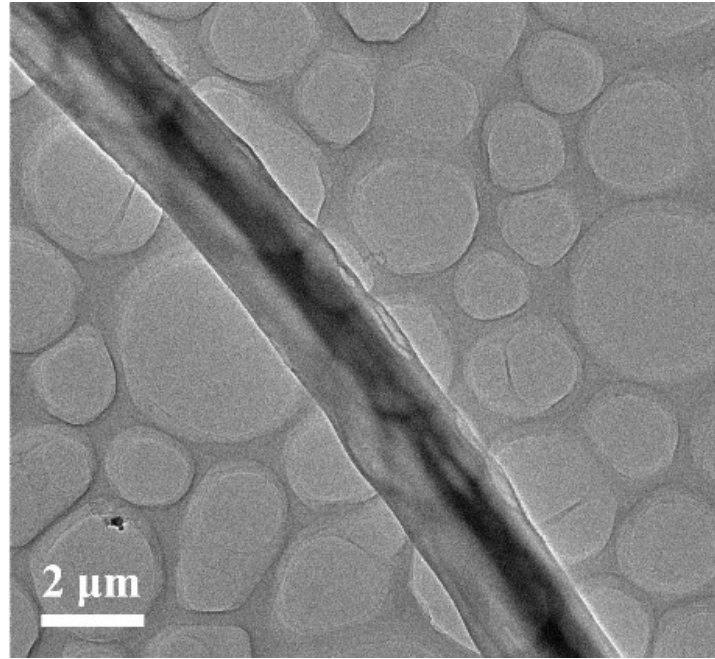

**Fig.S4** TEM image of SPCF4 sample.

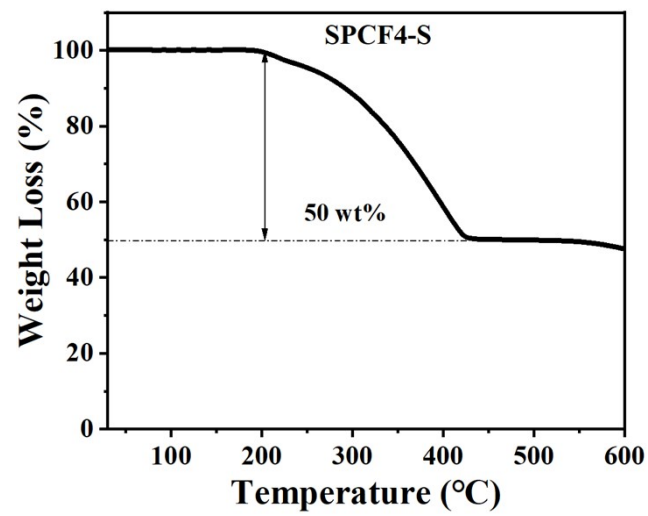

**Fig.S5** TGA curves of the SPCF-S composite.

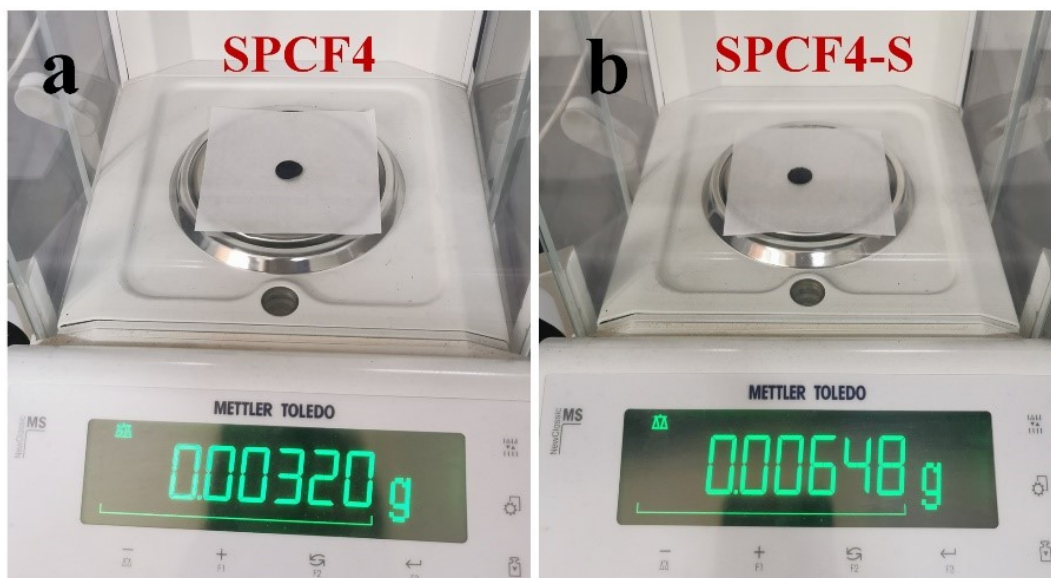

**Fig.S6** The weight changes of (a) SPCF4 and (b) SPCF4-S samples before and after loading active sulfur.

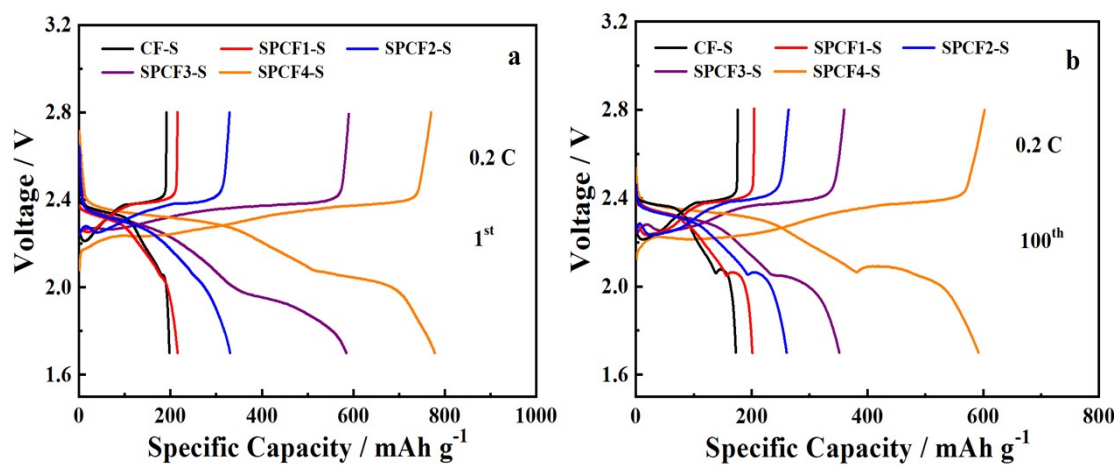

**Fig.S7** (a) The first and (b) 100<sup>th</sup> charge/discharge curves of CF-S, SPCF1-S, SPCF2-S, SPCF3-S and SPCF4-S electrodes at 0.2 C.

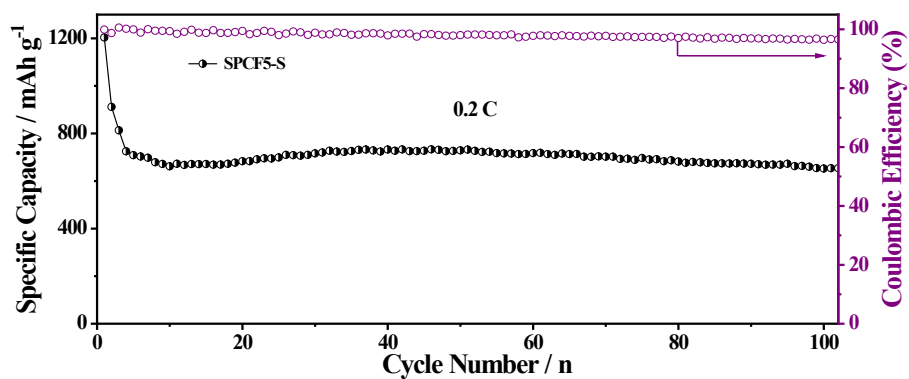

**Fig.S8** Cycling performances of SPCF5-S cathodes at 0.2 C after two cycles activation at 0.05 C.

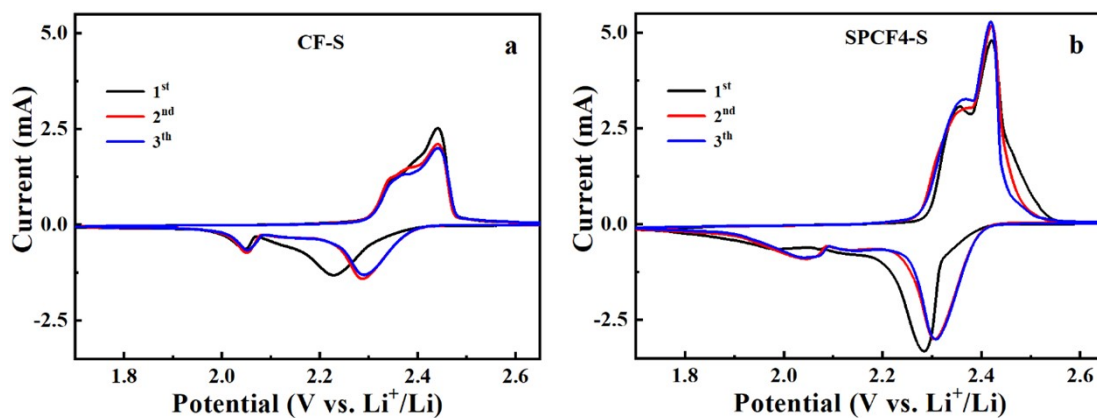

**Fig.S9** CV curves of (a) CF-S and (b) SPCF4-S electrodes with the first third cycles.

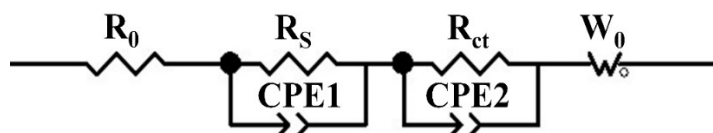

**Fig.S10** Equivalent circuit model.

**Table S1.** Electrochemical performance comparison of Li-S batteries employing CF host cathode in this work and those reported in the literatures.

| Cathode                   | Sulfur loading (mg cm <sup>-2</sup> ) | Current density (C*) | Initial discharge capacity (mAh g <sup>-1</sup> ) | Cycling number | Capacity retention (%) | Ref.             |
|---------------------------|---------------------------------------|----------------------|---------------------------------------------------|----------------|------------------------|------------------|
| MoS <sub>2</sub> @G-PCNFs | 1.0                                   | 0.1                  | 1385                                              | 100            | 61.8                   | [S1]             |
| CFC-S                     | 1.2                                   | 0.2                  | 893                                               | 30             | 60.9                   | [S2]             |
| PCC-S                     | 1.4                                   | 0.1                  | 915                                               | 100            | 62.3                   | [S3]             |
| TiO <sub>2</sub> -ACF/S   | 3.2                                   | 0.2                  | 915                                               | 100            | 77.0                   | [S4]             |
| CoO/Co@PCF-S              | 3.0                                   | 0.1                  | 945.8                                             | 100            | 75.9                   | [S5]             |
| <b>SPCF4-S</b>            | <b>3.0</b>                            | <b>0.2</b>           | <b>778</b>                                        | <b>100</b>     | <b>76.0</b>            | <b>This work</b> |

[S1] C. Chai, H. Tan, X. Fan and K. Huang, *J. Alloys Compd.*, 2020, **820**, 153144.

[S2] W. Xiao, L. Mi, S. Cui, H. Hou and W. Chen, *New J. Chem.*, 2016, **40**, 93-96.

[S3] Y. Fu, J. Hu, Q. Wang, D. Lin, K. Li and L. Zhou, *Carbon*, 2019, **150**, 76-84.

[S4] K. Xie, K. Zhang, Y. Han, K. Yuan, Q. Song, J. Wang, C. Shen, X. Liu and B. Wei, *Electrochim. Acta*, 2016, **210**, 415-421.

[S5] W. Ren, W. Ma, M. M. Umair, S. Zhang and B. Tang, *ChemSusChem*, 2018, **11**, 2695-2702.
